# Supplementary material for: Acute Fulminant Myocarditis After ChAdOx1 nCoV-19 Vaccine: A Case Report and Literature Review
Source: PubMed Central journal article supplement (PMC9068965; doi:10.3389/fcvm.2022.856991), 2022-04-21

## Supplementary Material

**Table 1. Relevant in-hospital laboratory data**

|                            | Reference        | 8/13 | 8/14 | 8/15 | 8/16  | 8/18 | 8/23 |
|----------------------------|------------------|------|------|------|-------|------|------|
| <b>Troponin I (ng/mL)</b>  | <0.3             | 8.1  | 6.8  | 5.6  | 2.1   |      |      |
| <b>Total CK (U/L)</b>      | Female 20-180    | 392  | 301  |      |       |      |      |
| <b>CK-MB (%)</b>           | 0-4              | 7.2  | 6.1  |      |       |      |      |
| <b>BNP (pg/mL)</b>         | <100             | 399  |      |      |       |      |      |
| <b>Lactate (mg/dL)</b>     | 4.5-19.8         | 20.6 | 17.3 |      |       |      |      |
| <b>CRP (mg/L)</b>          | <5               | 9    |      |      | 51.6* | 66.9 | 5.9  |
| <b>Na (mEq/L)</b>          | 136~146          | 137  |      | 136  | 134   | 134  | 138  |
| <b>K (mEq/L)</b>           | 3.5~5.1          | 4.3  | 3.9  | 3.6  | 4.3   | 3.5  | 4.1  |
| <b>Ca (mg/dL)</b>          | 8.6~10.3         | 7.4  | 7.9  | 7.5  | 7.5   |      |      |
| <b>Mg (mEq/L)</b>          | 1.3-2.1          | 1.6  | 2.0  | 2.0  | 2.0   |      |      |
| <b>BUN (mg/dL)</b>         | 7~25             | 14.8 |      |      | 7.7   | 10.9 | 13   |
| <b>Creatinine (mg/dL)</b>  | Female 0.44~1.03 | 0.56 |      |      | 0.46  | 0.53 | 0.49 |
| <b>ALT (U/L)</b>           | ≤36              | 100  | 149  |      |       |      | 55   |
| <b>ESR (mm/hr)</b>         | 0-20             | 2    |      |      |       |      |      |
| <b>PT INR</b>              | ≤1.2             | 1.2  |      |      |       |      |      |
| <b>D-Dimer (FEU ng/mL)</b> | ≤550             | 3815 | 6433 |      |       |      |      |
| <b>Fibrinogen (mg/dL)</b>  | 190-380          |      | 175  |      |       |      |      |
| <b>Hemoglobin (g/dL)</b>   | Female 12.0~16.0 | 12.4 |      | 10.6 | 10.5  | 10.7 | 11.6 |
| <b>Platelets (1000/uL)</b> | 150-400          | 251  |      | 237  |       | 271  | 337  |
| <b>WBC (1000/uL)</b>       | 3.5 ~11.0        | 11.7 |      | 11.8 |       | 9.9  | 7.2  |
| <b>Segment (%)</b>         | 42-74            | 88.2 |      | 84   |       | 78.2 | 69.3 |
| <b>Lymphocyte (%)</b>      | 20-56            | 8.8  |      | 10.4 |       | 14.6 | 20.3 |
| <b>Monocyte</b>            | 0-12             | 2.6  |      | 5    |       | 4.6  | 6.6  |
| <b>Eosinophil</b>          | 0-5              | 0.1  |      | 0.3  |       | 2.2  | 3.5  |
| <b>Basophil</b>            | 0-1              | 0.3  |      | 0.3  |       | 0.4  | 0.3  |

\*Urinary tract infection during admission

**Table 2. In-hospital medication**

| Medication     | Aug. 13            | 14 | 15 | 16         | 17            | 18       | 19 | 20 | 21 | 22 | 23 |
|----------------|--------------------|----|----|------------|---------------|----------|----|----|----|----|----|
| Norepinephrine | Keep MAP > 65 mmHg |    |    |            |               |          |    |    |    |    |    |
| Furosemide     | IV 20 mg BID       |    |    |            | Oral 20 mg QD |          |    |    |    |    |    |
| Ivabradine     |                    |    |    | 2.5 mg BID |               | 5 mg BID |    |    |    |    |    |
| Colchicine     | 0.5 mg QD          |    |    |            |               |          |    |    |    |    |    |
| Spirolactone   |                    |    |    |            |               | 25 mg QD |    |    |    |    |    |
| Losartan       |                    |    |    |            |               | 25 mg QD |    |    |    |    |    |
| Ceftriaxone *  |                    |    |    |            | IV 1g Q12h    |          |    |    |    |    |    |

\*For urinary tract infection

**Figure 1. Chest X-ray on 8/13/2021 (left) and 8/30/2021 (right)**

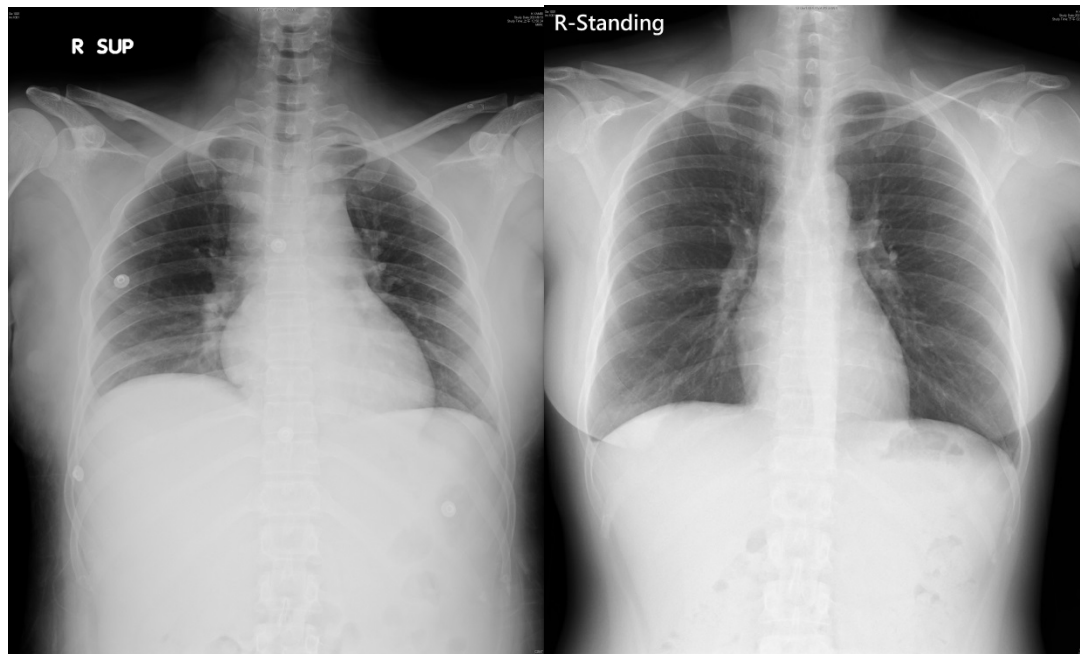

**Figure 2. Parasternal long axis view of echocardiogram on 8/13/2021**

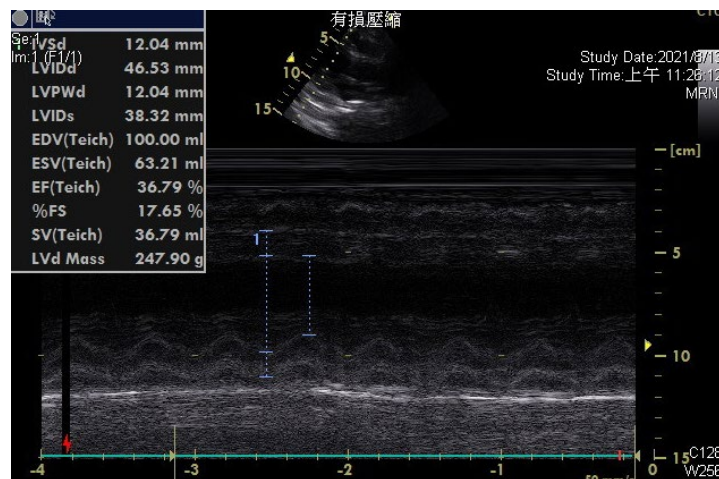

**Figure 3. ECG and parasternal long axis view of echocardiogram on 1/17/2022**

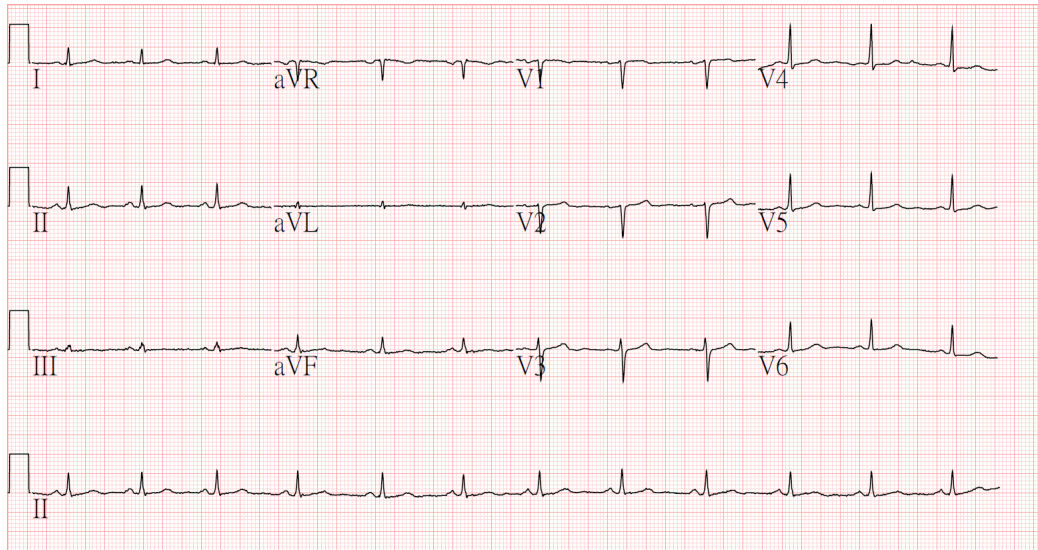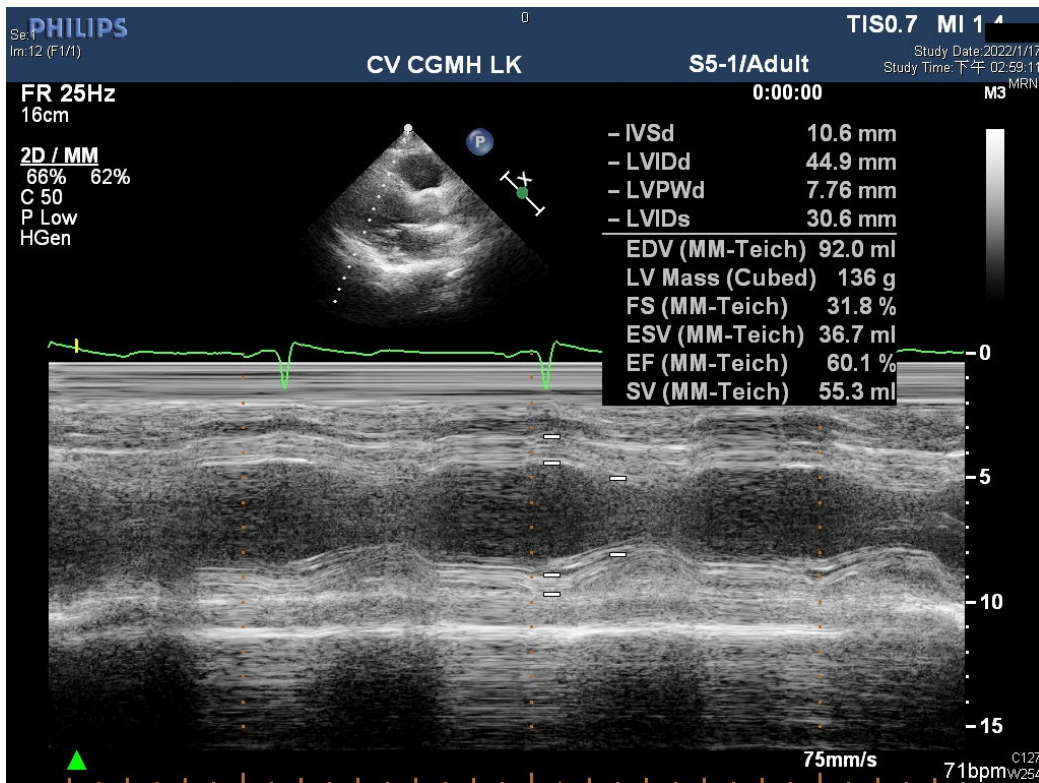

Supplement: Data_Sheet_1.pdf [file Data_Sheet_1.pdf]
